# Supplementary material for: Oxygen defect engineering on low-crystalline iron(iii) oxyhydroxide as a highly efficient electrocatalyst for water oxidation
Source: Royal Society of Chemistry journal article supplement (doi:10.1039/d3qi02043f), 2023-11-09
Supplement: d3qi02043f1.pdf [file d3qi02043f1.pdf]

## Supporting Information

### **Oxygen defect engineering on low-crystalline iron(III) oxyhydroxide as highly efficient electrocatalyst for water oxidation**

Yaning Fan<sup>a</sup>, Junjun Zhang<sup>a\*</sup>, Kongliang Luo<sup>a</sup>, Xuanyu Zhou<sup>a</sup>, Jiahua Zhao<sup>b</sup>, Weiwei Bao<sup>c</sup>, Hui Su<sup>d</sup>, Nailiang Wang<sup>a\*</sup>, Pengfei Zhang<sup>a,b</sup>, Zhenghong Luo<sup>a, b</sup>

[a]State Key Laboratory of High-Efficiency Utilization of Coal and Green Chemical Engineering. College of Chemistry and Chemical Engineering, Ningxia University, Yinchuan, Ningxia, 750021, China.

[b]School of Chemistry and Chemical Engineering, Shanghai Jiao Tong University, Shanghai, 200240, P. R. China

[c]National & Local Joint Engineering Laboratory for Slag Comprehensive Utilization and Environmental Technology, School of Material Science and Engineering, Shaanxi University of Technology, Hanzhong, Shaanxi, 723000 P. R. China

[d]Department of Chemistry, FRQNT Centre for Green Chemistry and Catalysis, McGill University, 801 Sherbrooke Street W., Montreal, QC H3A 0B8, Canada

\*Corresponding authors

Email address:

zhangjj089@nxu.edu.cn (J.J. Zhang); wangnl@nxu.edu.cn (N. L. Wang);

# List of Contents

## 1 Experiment Section

1.1 Materials

1.2 Preparation of FeOOH

1.3 Electrode preparation

1.4 Electrochemical characterizations

1.5 Material characterizations

1.6 Computational details

## 2. Supplementary Figures:

**Fig. S1** Representation of catalyst preparation process.

**Fig. S2** a) V<sub>O</sub>-FeOOH powder and b) FeOOH powder sample.

**Fig. S3** V<sub>O</sub>-FeOOH, FeOOH, and IrO<sub>2</sub> ink-loaded electrodes and Ni foam (From left to right).

**Fig. S4** XPS survey scan of V<sub>O</sub>-FeOOH sample.

**Fig. S5** Barrett-Joyner-Halenda(BJH) pore size distribution for V<sub>O</sub>-FeOOH sample.

**Fig. S6** AFM image of V<sub>O</sub>-FeOOH sample.

**Fig. S7** The EDS of V<sub>O</sub>-FeOOH sample.

**Fig. S8** SAED pattern of V<sub>O</sub>-FeOOH sample.

**Fig. S9** Electrochemical properties of V<sub>O</sub>-FeOOH with different loadings (25, 50, 75, 100, 125  $\mu$ L). a) LSV curves, b) EIS, c) Tafel slopes, d) overpotentials based 50 and 100 mA cm<sup>-2</sup>.

**Fig. S10** CV curves of electrodes at different scan rates from 20 to 100 mV s<sup>-1</sup>. a) V<sub>O</sub>-FeOOH, b) IrO<sub>2</sub>, c) NF.

**Fig.S11** The electrochemical impedance spectroscopy equivalent circuit diagram.

**Fig. S12** The Operando Nyquist of a) IrO<sub>2</sub> and b) NF at various overpotentials in 1.0 M KOH electrolyte. (Inset in Fig. S3b: partially enlarged image).

**Fig. S13** The Bode phase plots of a) IrO<sub>2</sub> and b) NF at various overpotential in 1.0 M KOH electrolyte.

**Fig.S14** a) In-situ Nyquist and b) Bode phase diagrams of V<sub>O</sub>-FeOOH samples supported on carbon cloth at different overpotentials in 1.0 M KOH electrolyte.

**Fig.S15** The long-time E-t curves of V<sub>O</sub>-FeOOH for OER under a constant current of 100 mA cm<sup>-2</sup>.

**Fig.S16** a) The two-electrode water splitting device diagram, b) amplification schematic diagram of two-electrode water splitting device, c) LSV plots of the V<sub>O</sub>-FeOOH||Pt/C, RuO<sub>2</sub>||Pt/C for overall alkaline water splitting, d) E-t curve of V<sub>O</sub>-

FeOOH||Pt/C for overall water splitting at 10 mA cm<sup>-2</sup> in 1.0 M KOH electrolyte.

**Fig.S17** a) SEM image of V<sub>O</sub>-FeOOH NF before OER and b) SEM image, c) TEM image, b) HRTEM image, c) the different regions corresponding intensity profiles along with the position of V<sub>O</sub>-FeOOH after OER.

**Fig. S18** XRD patterns of FeOOH and standard card.

**Fig.S19** The a) HR-TEM image and b) the different regions corresponding intensity profiles along with the position of FeOOH.

**Fig. S20** The XPS spectrum of FeOOH sample.

**Fig.S21** O1s high resolution XPS spectra of V<sub>O</sub>-FeOOH and FeOOH samples.

**Fig. S22** Fe2p high resolution XPS spectra of V<sub>O</sub>-FeOOH and FeOOH samples.

**Fig. S23** Comparison of overpotential of V<sub>O</sub>-FeOOH and FeOOH samples at different current density.

**Fig. S24** a) CV curves of electrodes at different scan rates from 20 to 100 mV s<sup>-1</sup> of FeOOH, b) The C<sub>dl</sub> obtained at the specific potential of synthesized V<sub>O</sub>-FeOOH and FeOOH samples.

**Fig. S25** a) N<sub>2</sub> adsorption-desorption isotherms and b) Barrett-Joyner-Halenda(BJH) pore size distribution for FeOOH sample.

**Fig. S26** Density of states of (a) V<sub>O</sub>-FeOOH and (b) FeOOH samples, respectively.

**Fig. S27** Optimized configurations of a) V<sub>O</sub>-FeOOH and b) O\*, c) OH\*, and d) OOH\* species adsorbed on V<sub>O</sub>-FeOOH sample.

**Fig. S28** Optimized configurations of a) FeOOH and b) O\*,c) OH\*,and d) OOH\* species adsorbed on FeOOH samples.

### 3. Supplementary Tables

**Table S1.** Comparison of the OER performance of V<sub>O</sub>-FeOOH catalyst with other reported OER catalysts

### 4.Reference

## 1. Experiment Section

### 1.1 Materials

NaBH<sub>4</sub> (Sinopharm Chemical Reagent Co., Ltd. analytically pure), Fe(NO<sub>3</sub>)<sub>3</sub>·9H<sub>2</sub>O (Aladdin, ≥ 99.9%), IrO<sub>2</sub> (Macklin, Ir ≥ 84.5%), FeCl<sub>3</sub> (Macklin, analytically pure), NaNO<sub>3</sub> (Sinopharm Chemical Reagent Co., Ltd. analytically pure), Nafion dispersion, anhydrous ethanol (99.9%), hydrochloric acid (37%), acetone, deionized water. All chemicals were used as received without further purification.

### 1.2 Preparation of FeOOH

5mmol FeCl<sub>3</sub> and 20mmol NaNO<sub>3</sub> were dissolved in 50ml deionized water, ultrasonic until completely dissolve<sup>1-2</sup>. After stirring and heating to 100°C, it was kept for 15min. The cooled reaction liquid was centrifuged, rinsed and dried. The brick red powder (Fig. S2b), denoted as FeOOH, was obtained.

### 1.3 Electrode preparation

Nickel foam was cut into small rectangular pieces of 1\*3cm<sup>2</sup>. After ultrasonic cleaning with 3mol L<sup>-1</sup> HCl for 15 min, they were washed with deionized water, anhydrous ethanol and acetone for three times. After absorbing the surface moisture, they were placed in a vacuum drying oven at 60°C for 6h.

5.0 mg V<sub>O</sub>-FeOOH, FeOOH and IrO<sub>2</sub> were added into a 1.5ml centrifuge tube, and 600uL deionized water, 400uL dehydrated alcohol and 10uL nafion dispersion were added with a pipette gun, and ultrasounded for 60 min. The prepared ink was applied to NF ( 1\*1cm<sup>2</sup> ) with a pipette at 25 uL each time, and dried for 15 min after each application, for a total of 4 times (Fig. S2). In order to seek the best performance, five samples of 25, 50, 75, 100 and 125 uL were prepared, which were recorded as V<sub>O</sub>-FeOOH<sub>25</sub>(25uL), V<sub>O</sub>-FeOOH<sub>50</sub>(50uL), V<sub>O</sub>-FeOOH<sub>75</sub>(75uL), V<sub>O</sub>-FeOOH<sub>100</sub>(100uL) and V<sub>O</sub>-FeOOH<sub>125</sub>(125uL). The electrochemical performance test shows that V<sub>O</sub>-FeOOH<sub>100</sub> has the best chemical performance, denoted as V<sub>O</sub>-FeOOH.

### 1.4 Electrochemical characterizations

Electrochemical performance tests were performed at room temperature using an electrochemical workstation (DH7000C, Donghua, Jiangsu, China). V<sub>O</sub>-FeOOH,

FeOOH and IrO<sub>2</sub> were uniformly coated on nickel foam as working electrode, graphite rod and standard Hg/HgO electrode as counter electrode and reference electrode, 1 M KOH as electrolyte. At the beginning of the experiment, the catalyst was subjected to 20 cycles of cyclic voltammetry (CV) at 10mV/s at 0.5-1.2V to stabilize the catalyst surface. The oxygen evolution performance of the catalyst was determined by linear sweep voltammetry (LSV) in the range of 0-1.2V vs. Hg/HgO. Double layer capacitance (C<sub>dl</sub>) measurements were conducted by varying the scan rates (20, 40, 60, 80, 100mV/s) in a potential window nearly without Faradaic process. The electrochemical impedance spectroscopy (EIS) test was performed in the frequency range of 0.1-1000Hz, and the in-situ impedance of the catalyst was measured using EIS in the range of 0.45-0.80V. The turnover frequency (TOF) of the electrode was calculated at 1.55 V and 1.60 V. In the range of 0.5-1.2 V, 500 CV cycles were carried out at a scan rate of 50 mV s<sup>-1</sup>. The stability of the catalyst was evaluated by comparing the LVS and EIS before and after 500 CV cycles. The long-term stability of the catalyst was tested at 50 mA cm<sup>-2</sup>. At the same time, multi-steps current 10, 30, 50, 70, 90, 110 mA cm<sup>-2</sup> and multi-steps potential 1.524, 1.574, 1.624, 1.674, 1.724 V vs.RHE were used to evaluate the stability of the catalyst in the dynamic current and dynamic potential. The conversion formula between the measured value and the standard hydrogen electrode ( RHE ) is:

$$E_{RHE} = E_{Hg/HgO} + 0.059pH + 0.098V$$

The calculation formula of overpotential  $\eta$  :

$$\eta = E_{RHE} - 1.23V$$

Tafel slope calculation formula :

$$\eta = b \log j + a$$

The formula for calculating the turnover frequency ( TOF ) :

$$TOF = \frac{jA}{4nF}$$

### 1.5 Material characterizations

The X-ray diffraction (XRD) patterns were recorded on a Rigaku MiniFlex 600-C

X-ray diffractometer with Cu-K $\alpha$  radiation with a scan rate of 5° min<sup>-1</sup>. The electron paramagnetic resonance (EPR) spectra were collected on a Bruker A300 Paramagnetic spectrometer, which were performed at room temperature in vacuum. The thickness of the nanosheets was measured by atomic force microscopy (AFM). The Raman measurement was performed with a Raman JY HR800 Spectrometer, wavenumber region 150-600 cm<sup>-1</sup>. The Brunauer Emmett Teller (BET) pore size distribution method using a Micromeritics ASAP 2460. The Scanning electron microscopy (SEM) characterizations were conducted using a JSM-7800F from JEOL. Transmission electron microscopy (TEM) and high-resolution transmission electron microscopy (HRTEM) measurements were taken with a JEOL JEM-F200 microscope operated. The X-ray photoelectron spectroscopy (XPS) measurements were conducted on a Kratos Axis Ultra DLD spectrometer.

### 1.6 Computational details

All the density functional theory calculations were performed by using the Vienna ab initio Simulation Program (VASP)<sup>3</sup>. The generalized gradient approximation (GGA) in the Perdew-Burke-Ernzerhof (PBE) form and a cutoff energy of 500 eV for planewave basis set were adopted<sup>4-6</sup>. A 3 $\times$ 3 $\times$ 1 Monkhorst-Pack grid was used for sampling the Brillouin zones at structure optimization<sup>7</sup>. The ion-electron interactions were described by the projector augmented wave (PAW) method<sup>8</sup>. The convergence criteria of structure optimization were choose as the maximum force on each atom less than 0.02 eV/Å with an energy change less than 1 $\times$ 10<sup>-5</sup> eV. The DFT-D3 semiempirical correction was described via Grimme's scheme method<sup>9</sup>. The Gibbs free energy change ( $\Delta G$ ) for each elemental step is defined as<sup>10</sup>:

$$\Delta G = \Delta E + \Delta ZPE - T\Delta S + \Delta G_U + \Delta G_{\text{pH}} \quad (1)$$

where  $\Delta E$  and  $\Delta ZPE$  are the adsorption energy based on density functional theory calculations and the zero-point energy correction, respectively.  $T$ ,  $\Delta S$ ,  $U$ , and  $\Delta G_{\text{pH}}$  represent the temperature, the entropy change, the applied electrode potential, and the free energy correction of the pH, respectively. In alkaline medium, the reaction mechanism of OER is mainly AEM mechanism. The oxygen precursor undergoes a

process of adsorption-deprotonation-coupling-desorption. The metal sites first adsorb OH-, and then deprotonate to form \*O species. The O-O coupling generates \*OOH intermediates through OH-nucleophilic attack. Finally, the surface desorbs O<sub>2</sub> molecules through secondary deprotonation to release active metal sites. According to the above theory, we believe that Fe ions are active centers in V<sub>O</sub>-FeOOH catalyst, so the reaction energy required for the formation of active intermediates was calculated by AEM in the present situation.

## 2. Supplementary Figures:

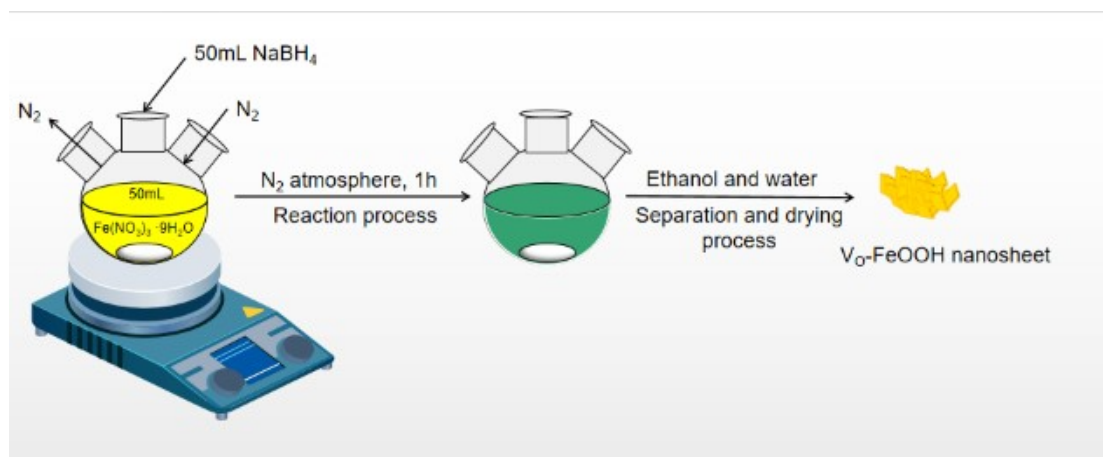

**Fig. S1** Representation of catalyst preparation process.



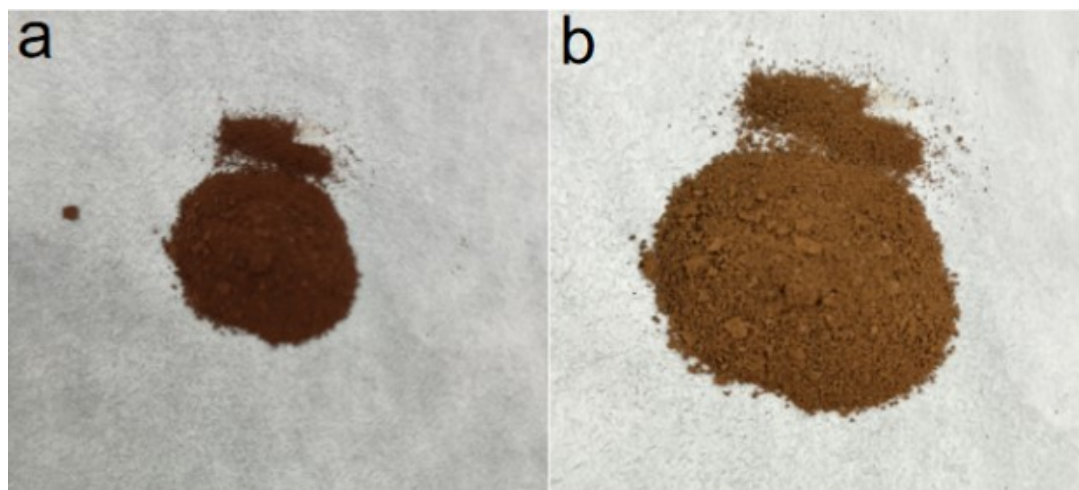

**Fig. S2** a)  $V_0$ -FeOOH powder and b) FeOOH powder sample.

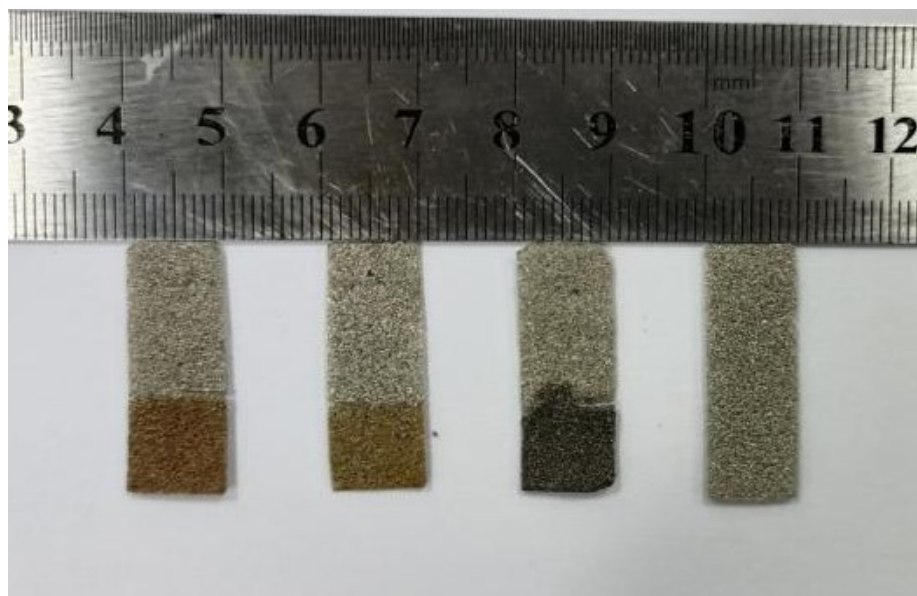

**Fig. S3**  $V_2O_5$ -FeOOH, FeOOH, and  $IrO_2$  ink-loaded electrodes and Ni foam (From left to right).

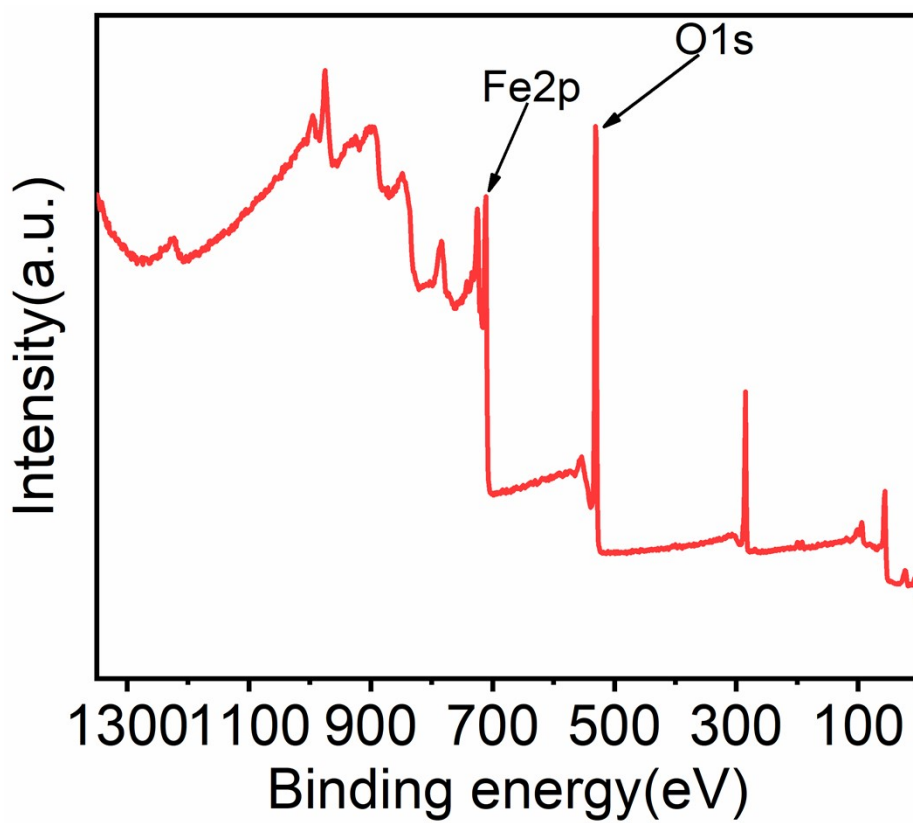

**Fig. S4** XPS survey scan of  $V_0$ -FeOOH sample.

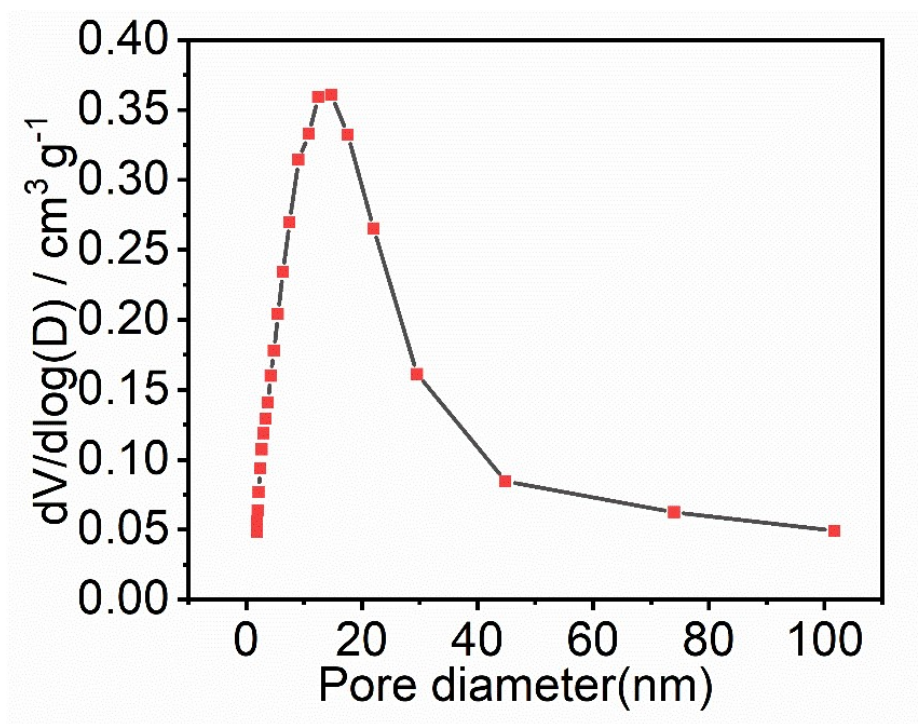

**Fig. S5** The Barrett-Joyner-Halenda(BJH) pore size distribution for VO-FeOOH sample.

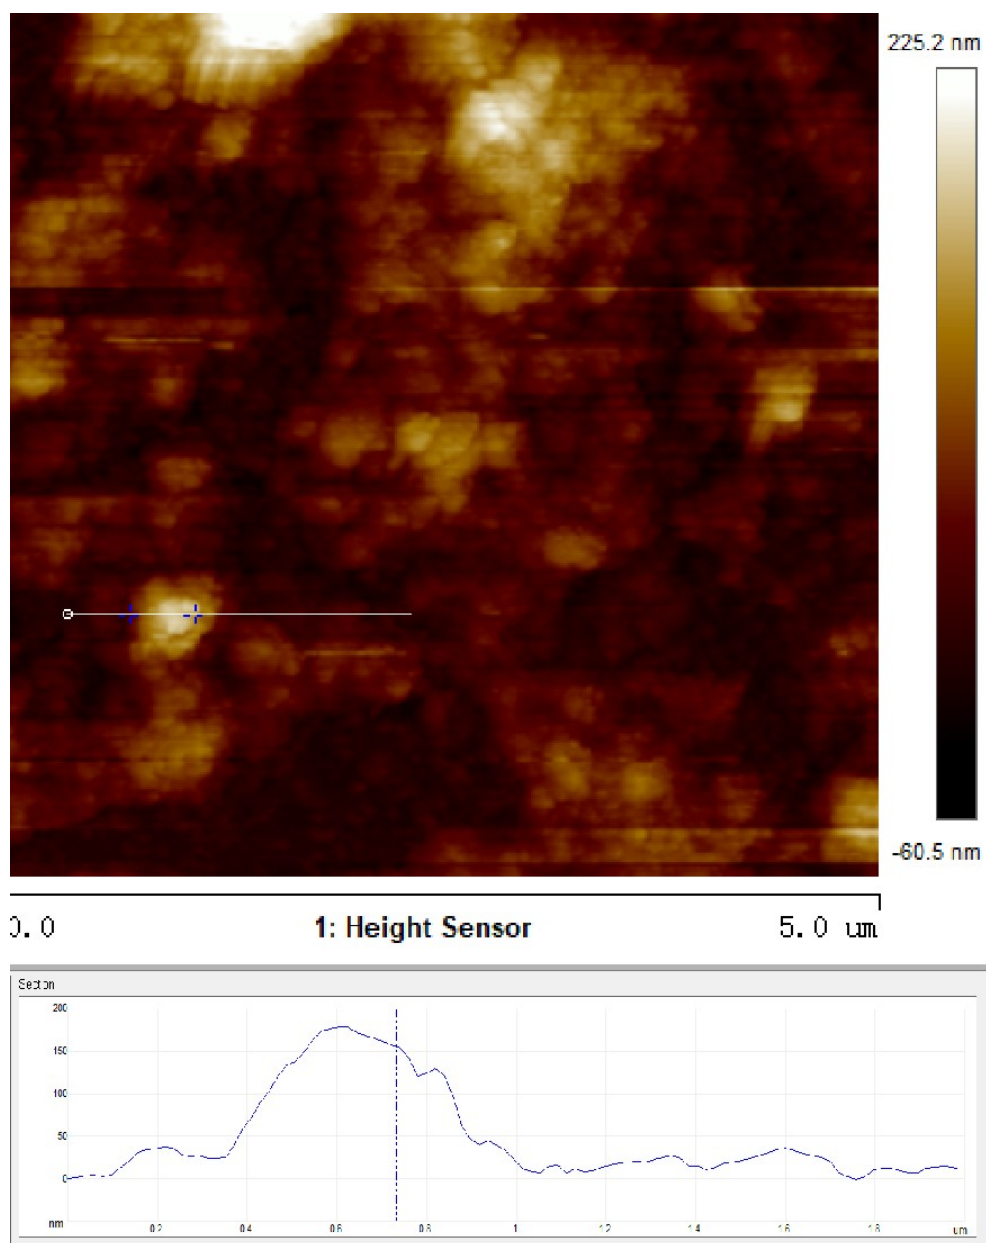

**Fig. S6** AFM image of  $V_O$ -FeOOH sample.

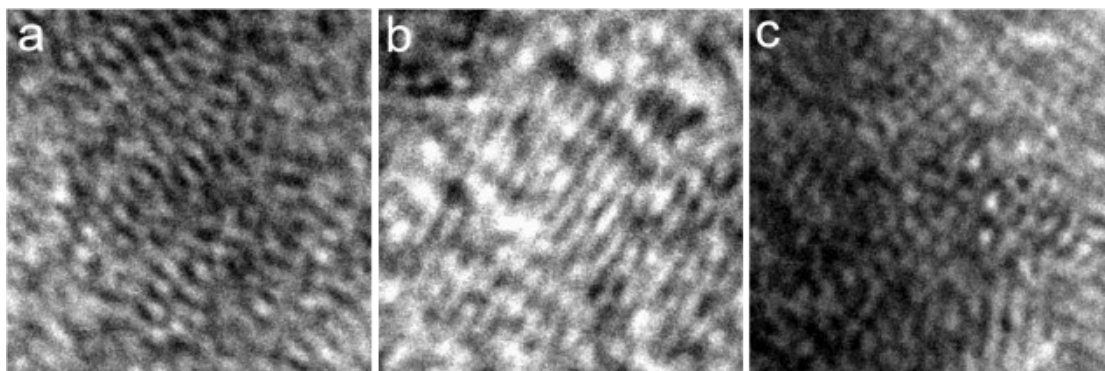

**Fig. S7** The inverse fast Fourier transform(FFT) of  $V_O$ -FeOOH sample based different regions (a, I ) (b, II) (c, III) .

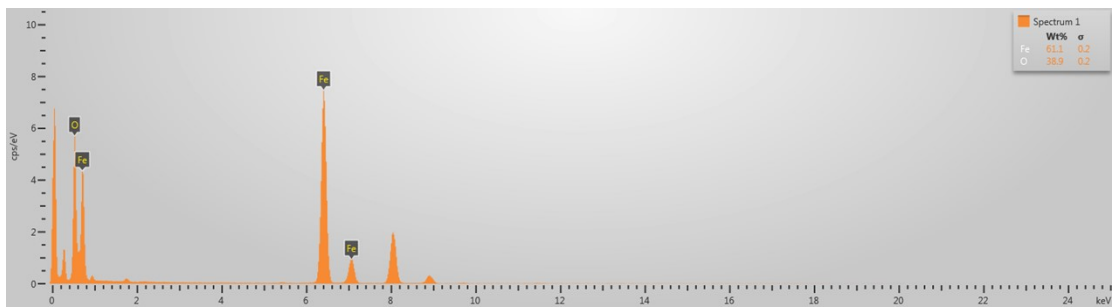

**Fig. S8** The EDS of V<sub>0</sub>-FeOOH sample.

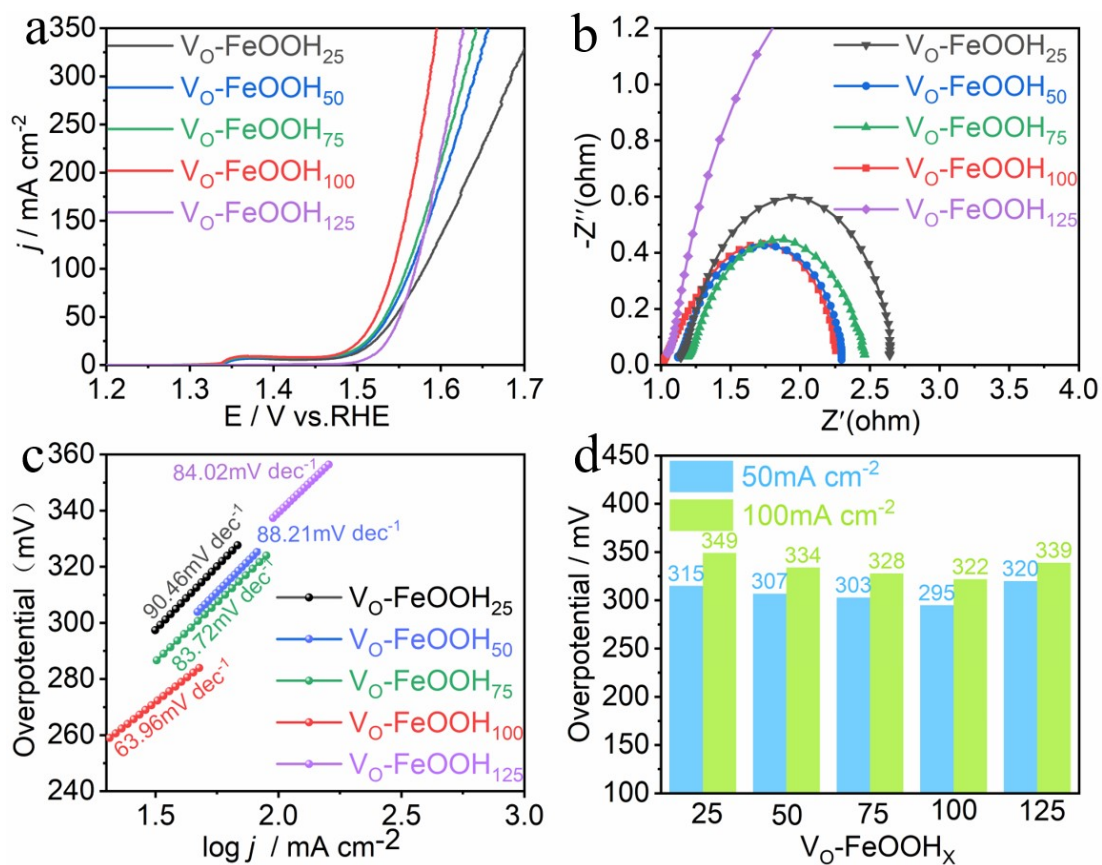

**Fig. S9** Electrochemical properties of  $\text{V}_\text{O}\text{-FeOOH}$  with different loadings (25, 50, 75, 100, 125  $\mu\text{L}$ ). a) LSV curves, b) EIS, c) Tafel slopes, d) overpotentials based 50 and 100  $\text{mA cm}^{-2}$ .



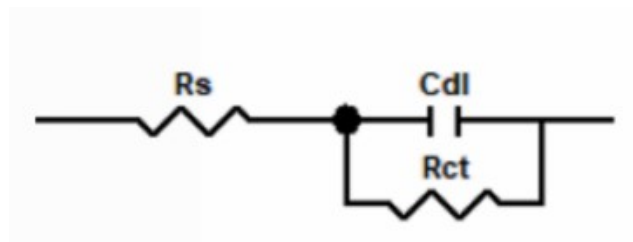

**Fig. S10** The electrochemical impedance spectroscopy equivalent circuit diagram.

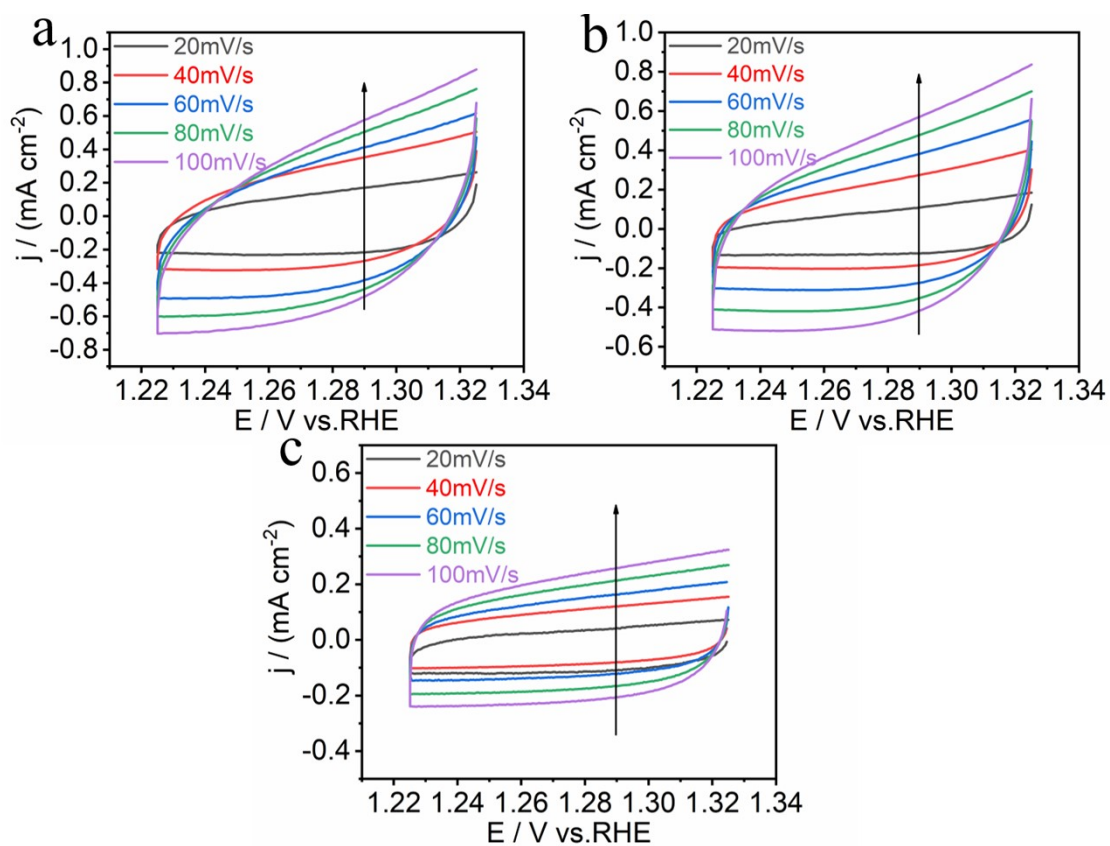

**Fig. S11** CV curves of electrodes at different scan rates from 20 to 100  $\text{mV s}^{-1}$ . a)  $\text{V}_\text{O}$ -FeOOH, b)  $\text{IrO}_2$ , c) NF.

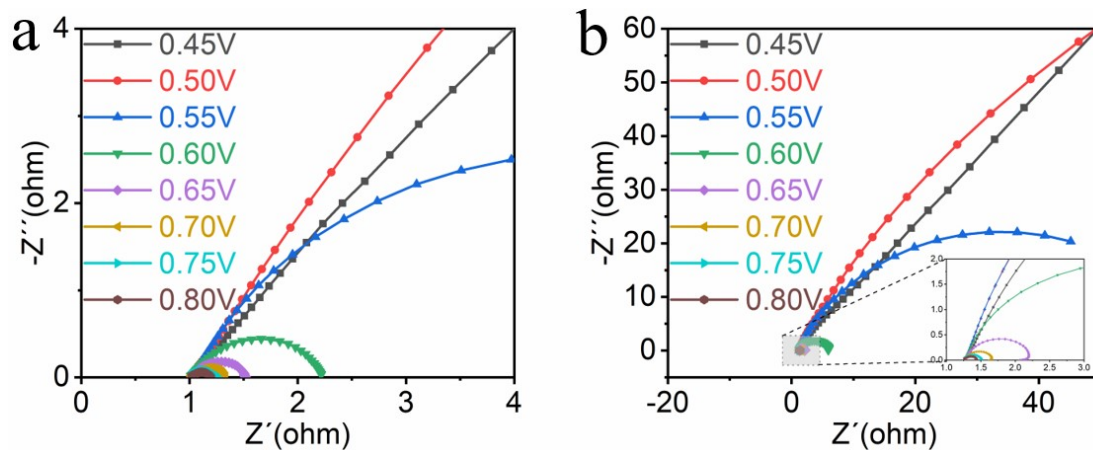

**Fig. S12** The Operando Nyquist of a) IrO<sub>2</sub> and b) NF at various overpotentials in 1.0 M KOH electrolyte. (Inset in Fig. S3b: partially enlarged image).

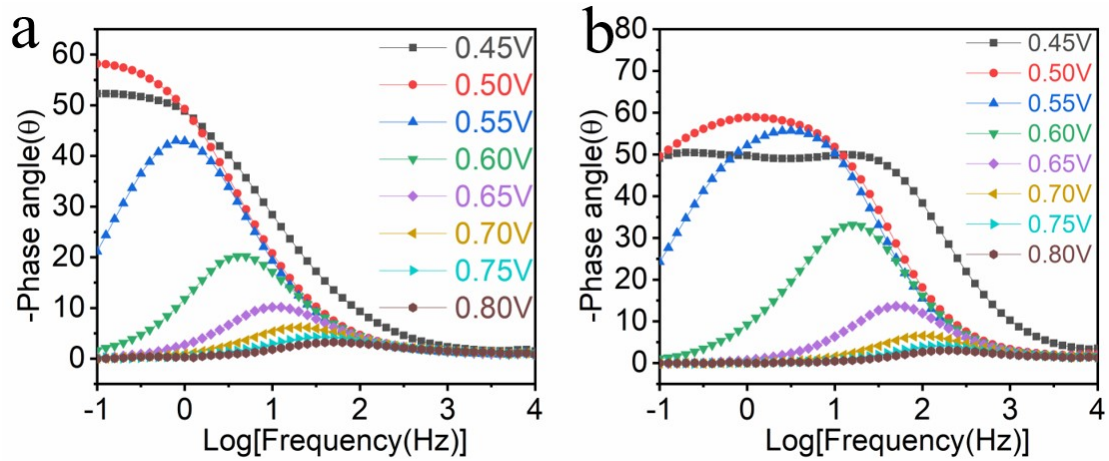

**Fig. S13** The Bode phase plots of a) IrO<sub>2</sub> and b) NF at various overpotential in 1.0 M KOH electrolyte.

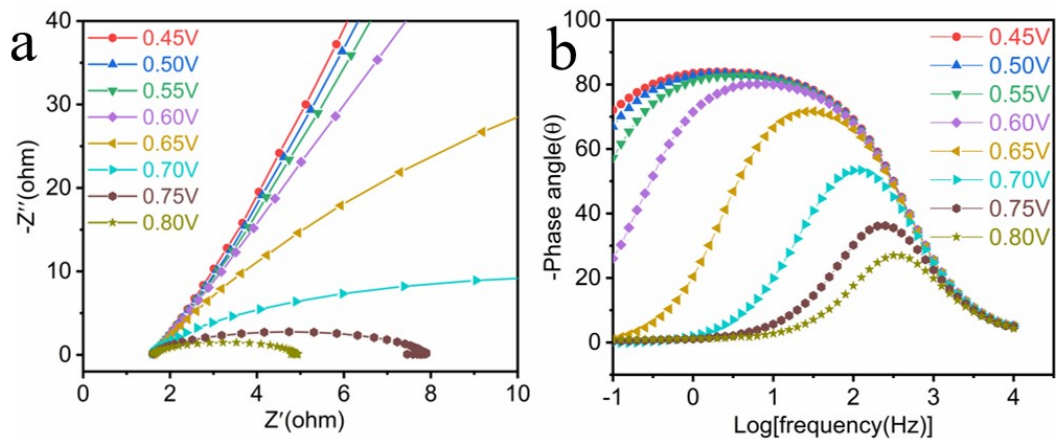

**Fig. S14** a) In-situ Nyquist and b) Bode phase diagrams of  $V_O$ -FeOOH sample supported on carbon cloth at different overpotentials in 1.0 M KOH electrolyte.

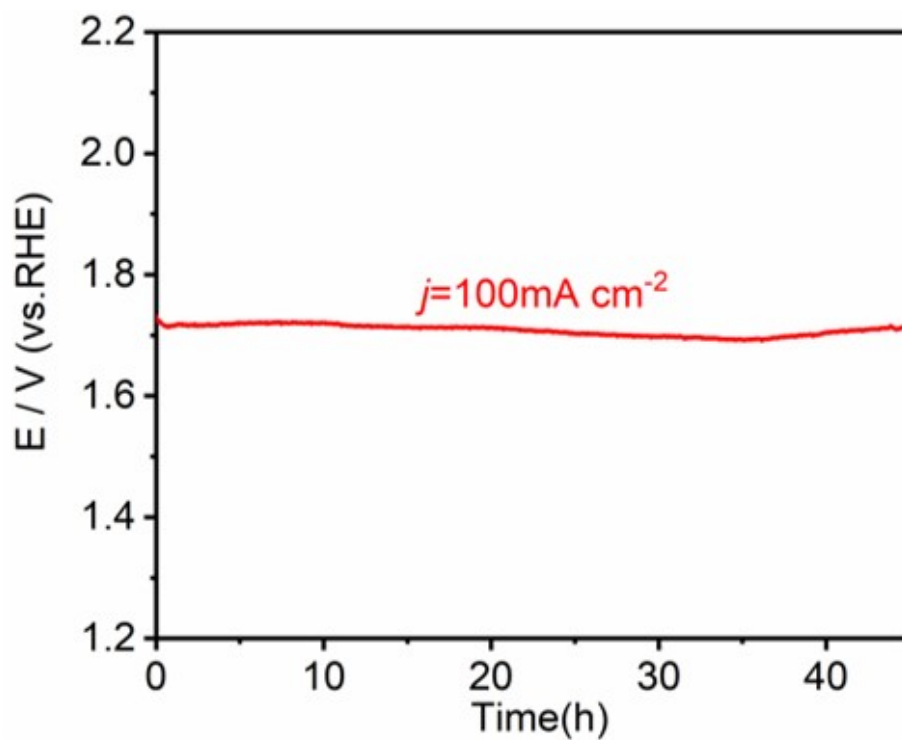

**Fig. S15** The long-time E-t curve of  $\text{V}_\text{O}$ -FeOOH for OER under a constant current of  $100\text{mA cm}^{-2}$ .

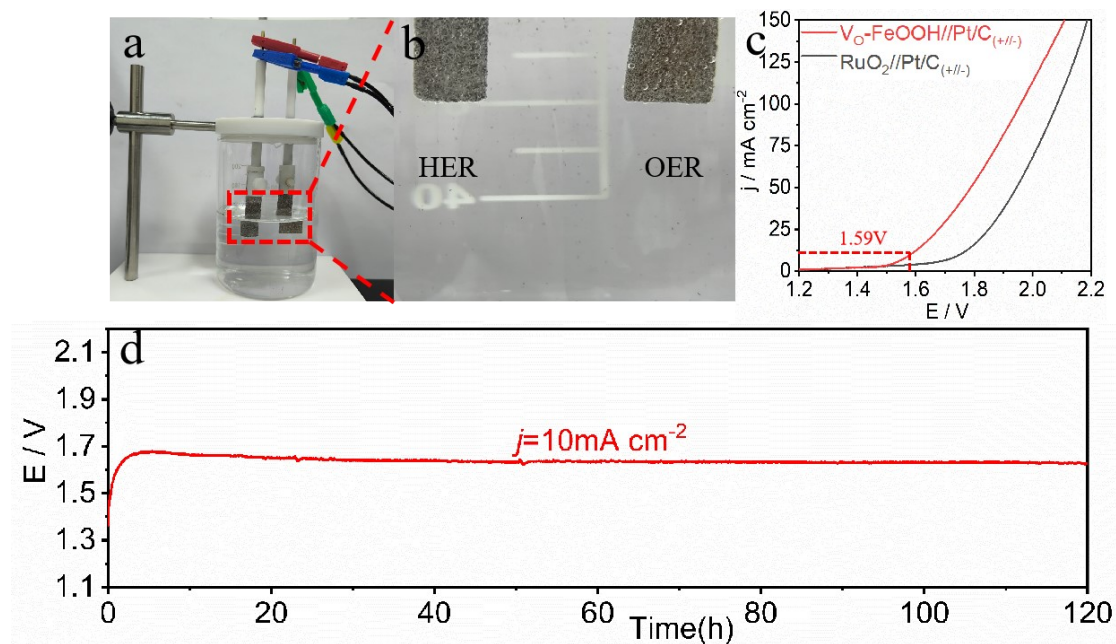

Fig. S16 a) The two-electrode water splitting device diagram, b) amplification schematic diagram of two-electrode water splitting device, c) LSV plots of the  $\text{V}_\text{O}\text{-FeOOH//Pt/C}$ ,  $\text{RuO}_2\text{//Pt/C}$  for overall alkaline water splitting, d) E-t curve of  $\text{V}_\text{O}\text{-FeOOH//Pt/C}$  for overall water splitting at  $10 \text{ mA cm}^{-2}$  in 1.0 M KOH electrolyte.

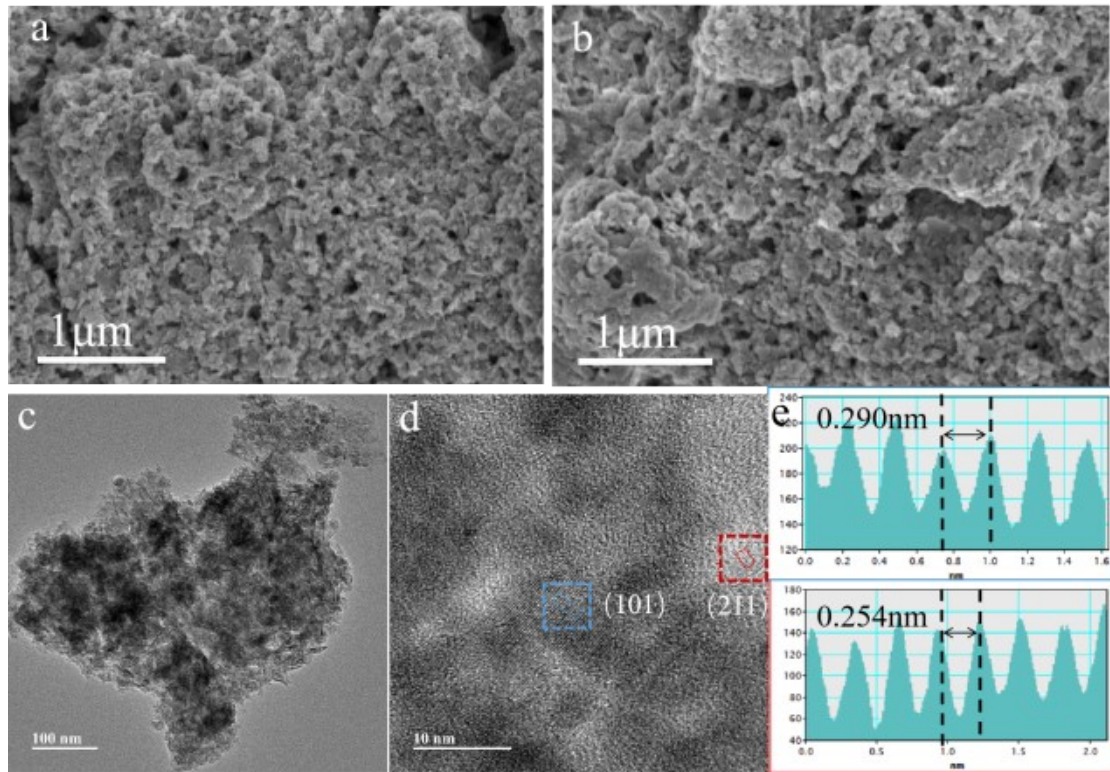

**Fig. S17** a) SEM image of  $V_O$ -FeOOH before OER and b) SEM image, c) TEM image, d) HRTEM image, e) the different regions corresponding intensity profiles along with the position of  $V_O$ -FeOOH after OER.



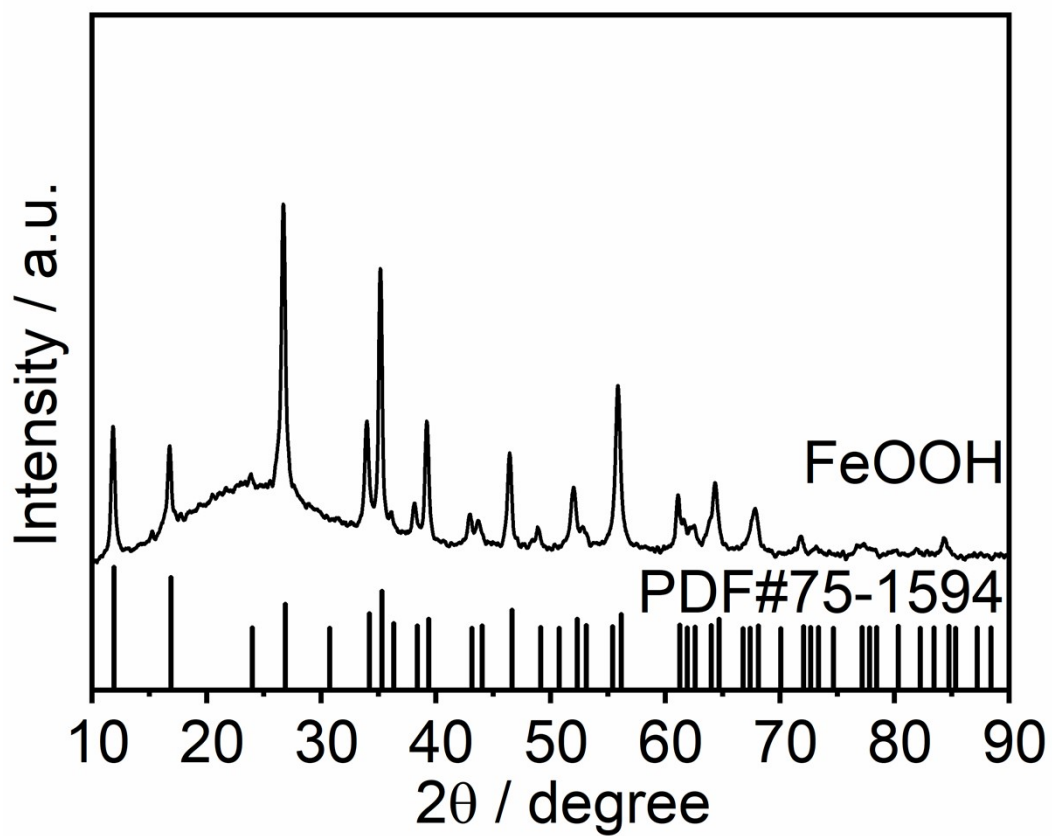

Fig. S18 XRD patterns of FeOOH and standard card.

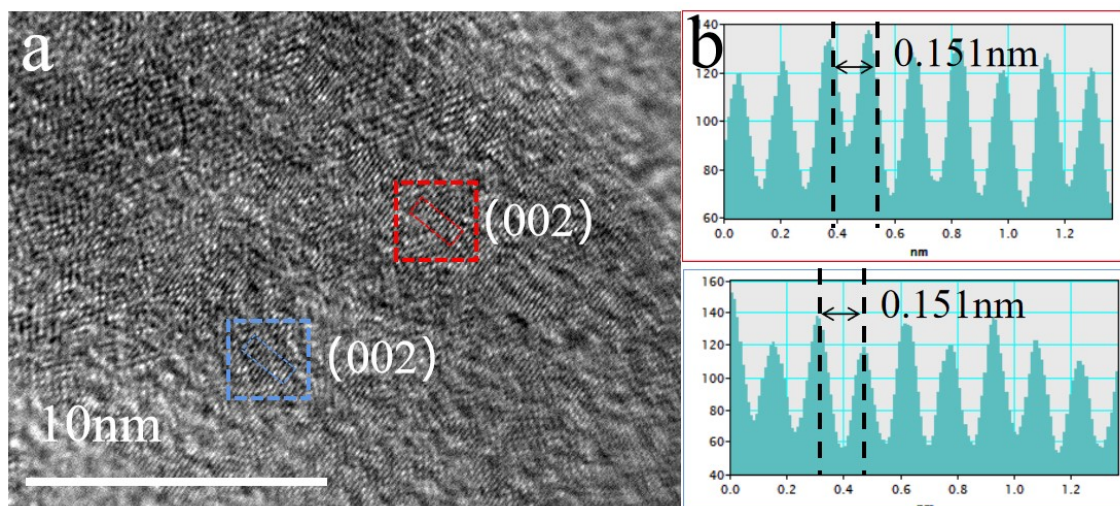

Fig. S19 The a) HRTEM image and b) the different regions corresponding intensity profiles along with the position of FeOOH.

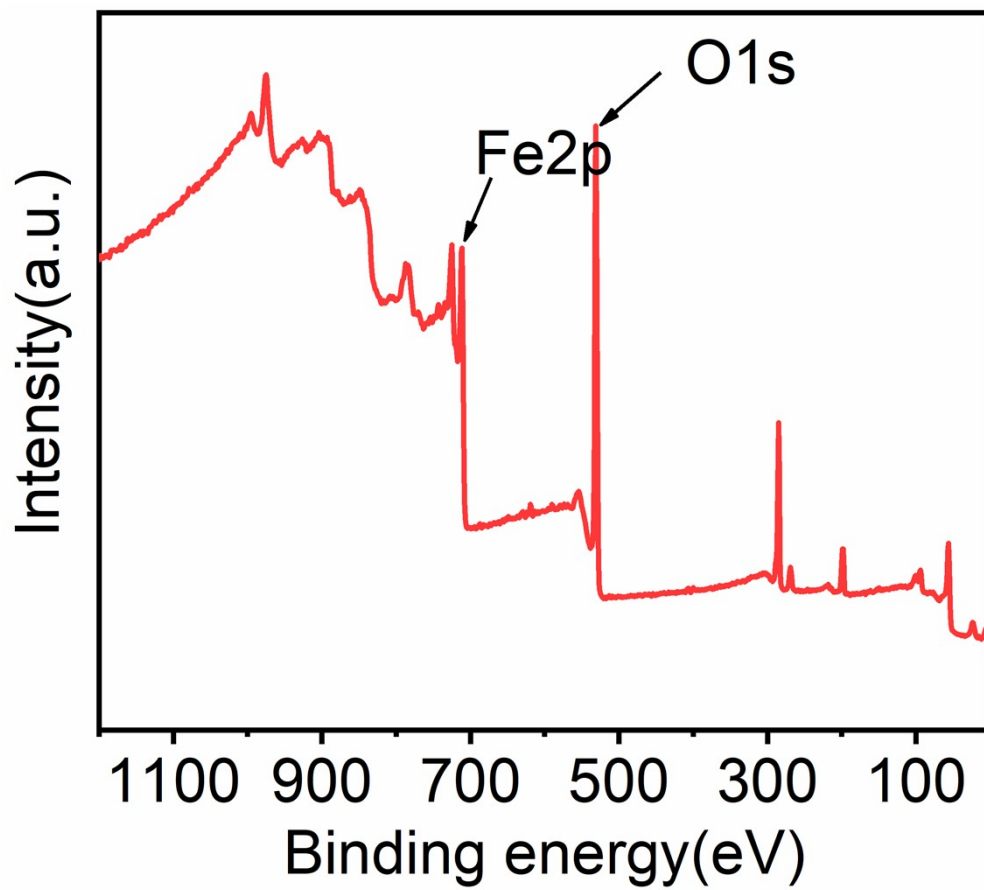

**Fig. S20** The XPS spectrum of FeOOH sample.

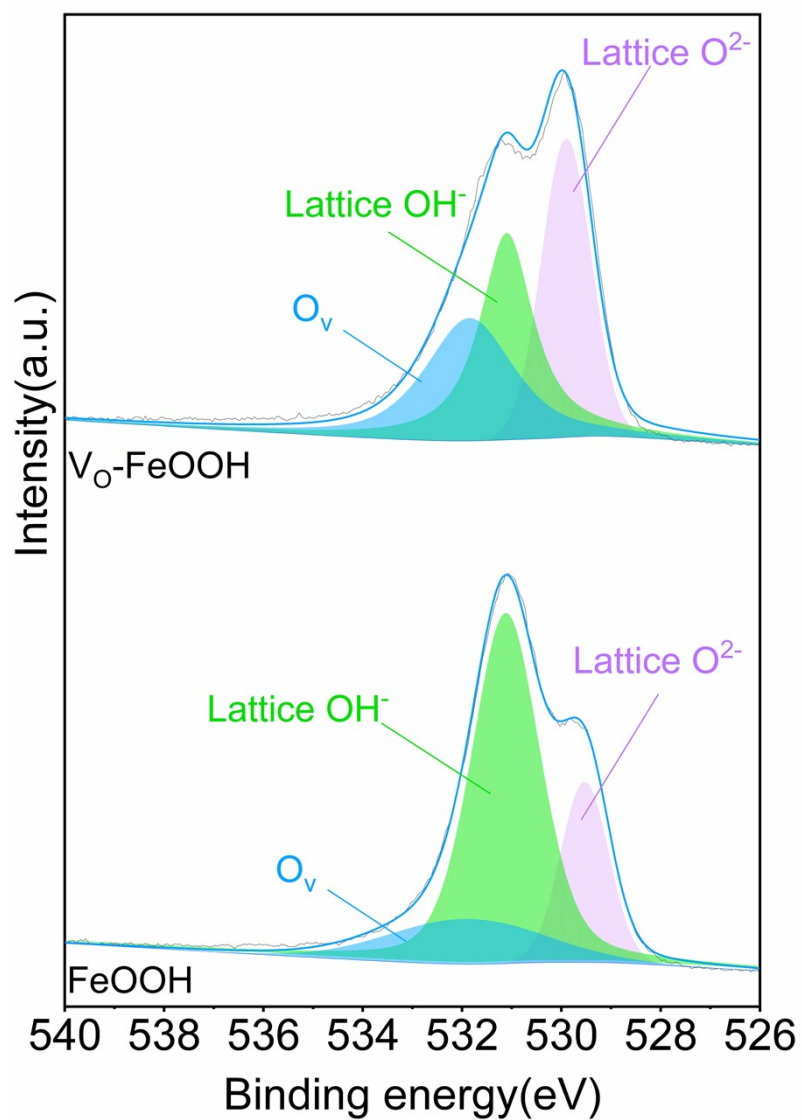

**Fig. S21** O1s high resolution XPS spectra of  $V_O$ -FeOOH and FeOOH samples.

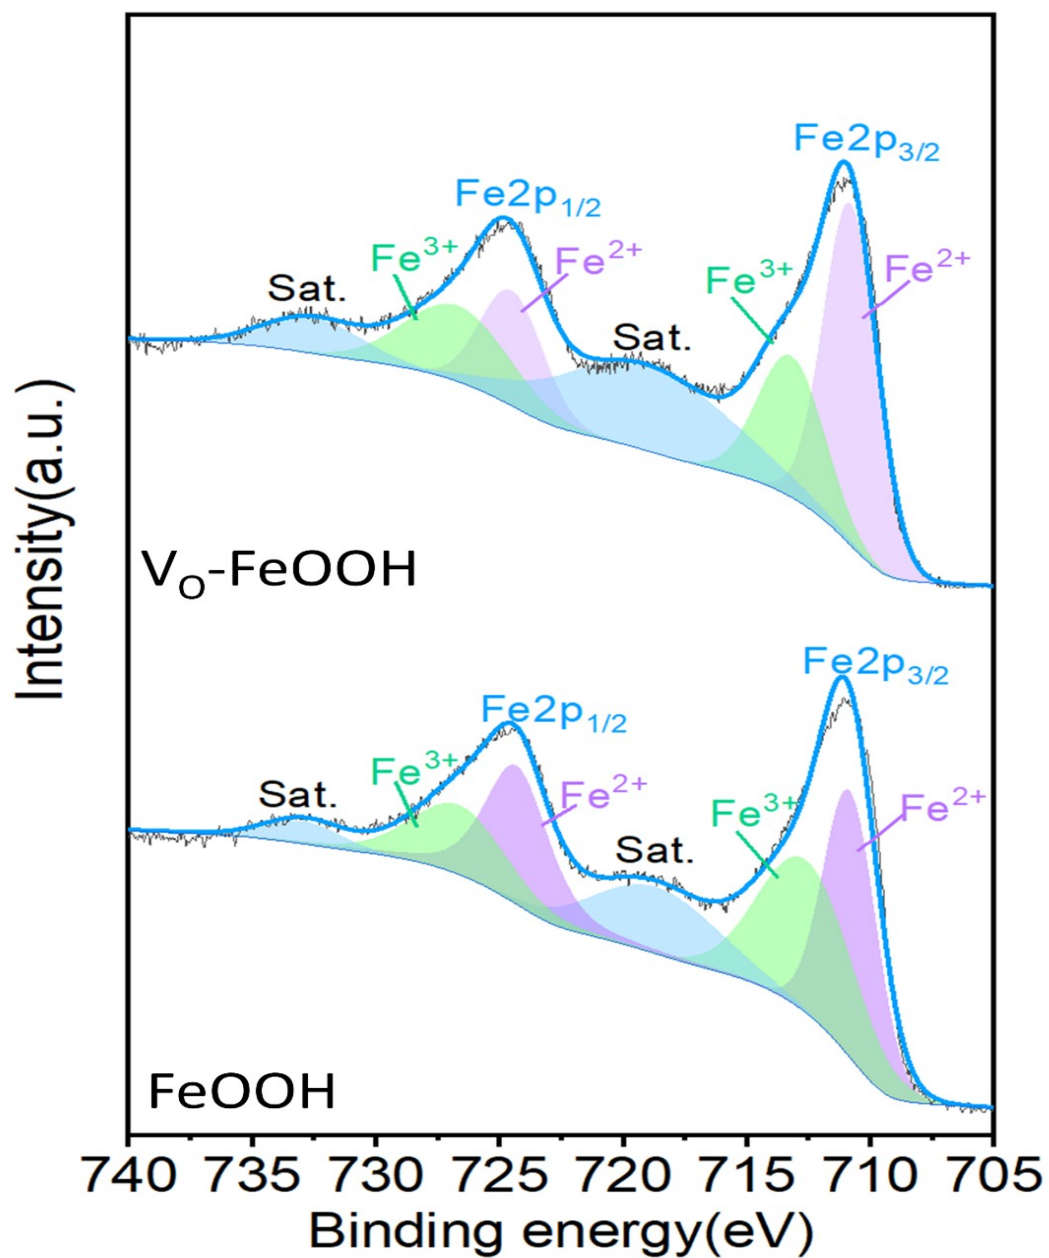

Fig. S22 Fe2p high resolution XPS spectra of  $V_O\text{-FeOOH}$  and  $\text{FeOOH}$  samples.

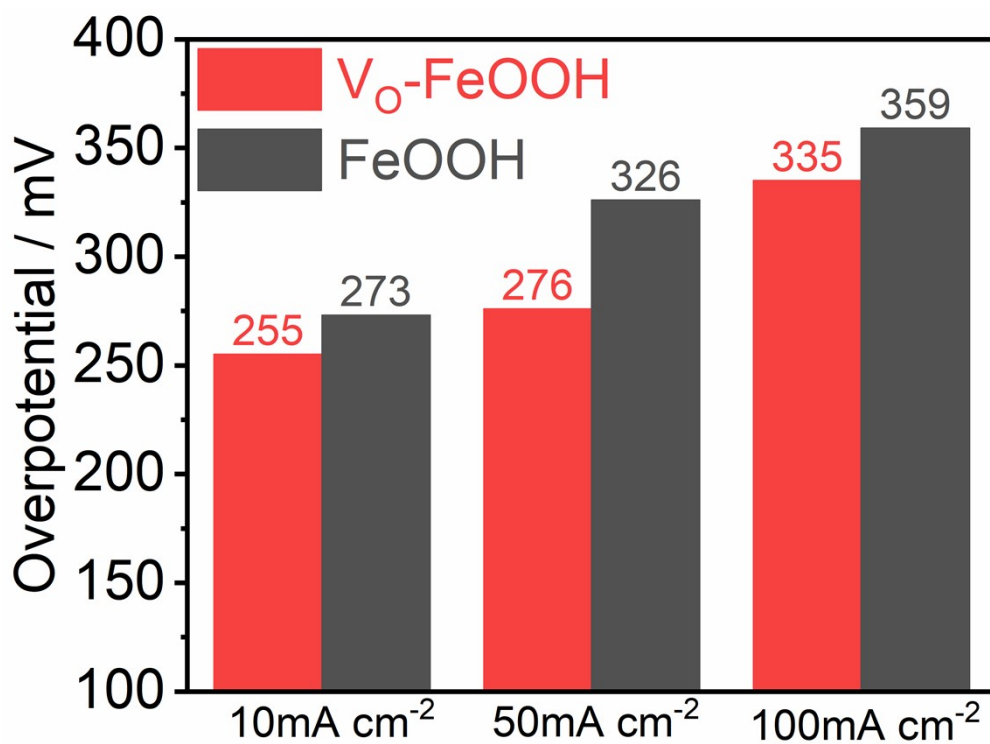

**Fig. S23** Comparison of overpotential of V<sub>O</sub>-FeOOH and FeOOH samples at different current density.

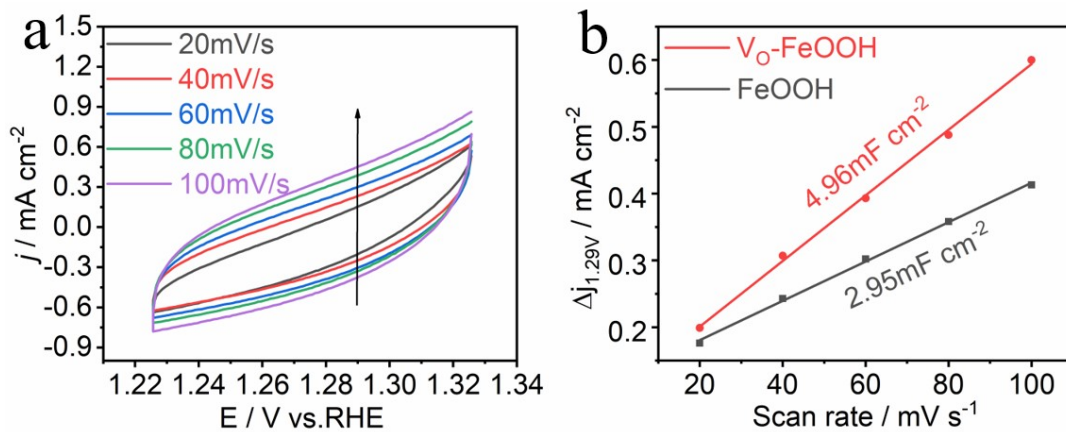

**Fig. S24** a) CV curves of electrodes at different scan rates from 20 to 100  $\text{mV s}^{-1}$  of FeOOH, b) The  $C_{dl}$  obtained at the specific potential of synthesized  $V_{\text{O}}\text{-FeOOH}$  and FeOOH samples.

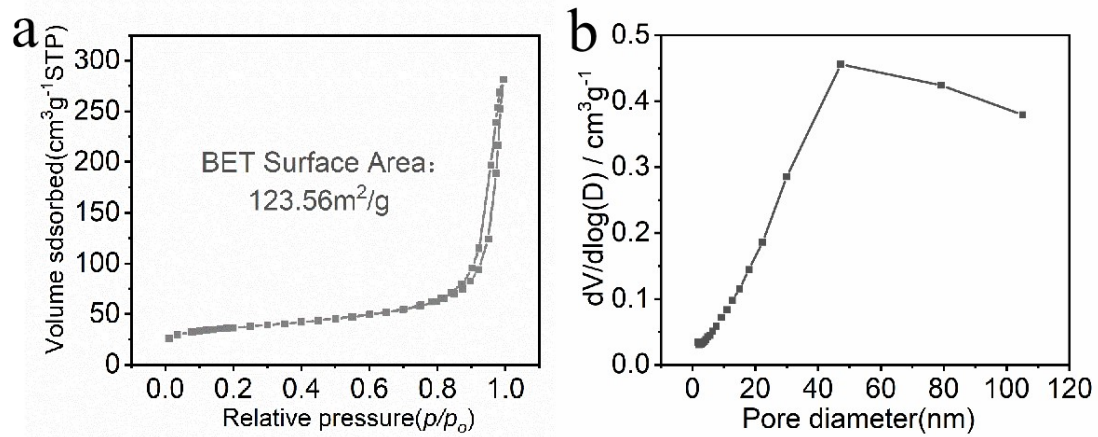

**Fig. S25** a)  $N_2$  adsorption-desorption isotherms and b) Barrett-Joyner-Halenda (BJH) pore size distribution for FeOOH sample.





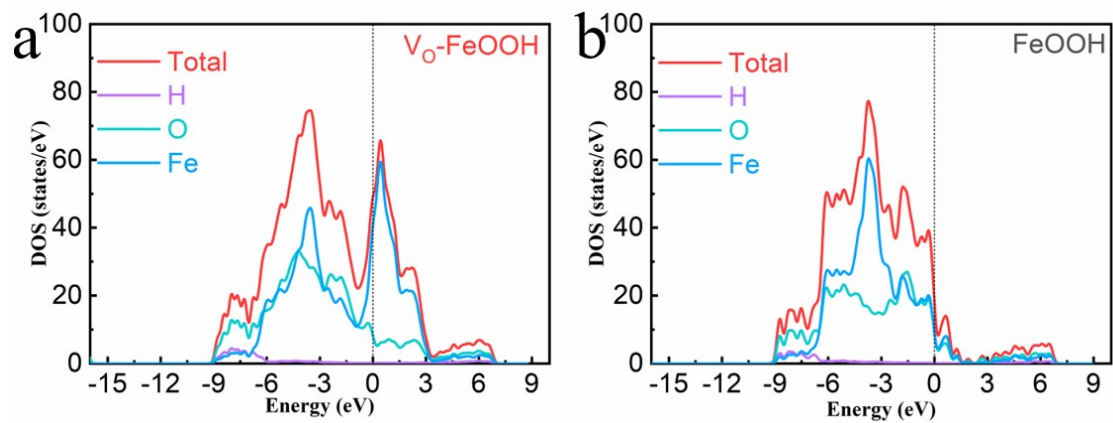

**Fig. S26** Density of states of (a)  $V_O$ -FeOOH and (b) FeOOH samples, respectively.

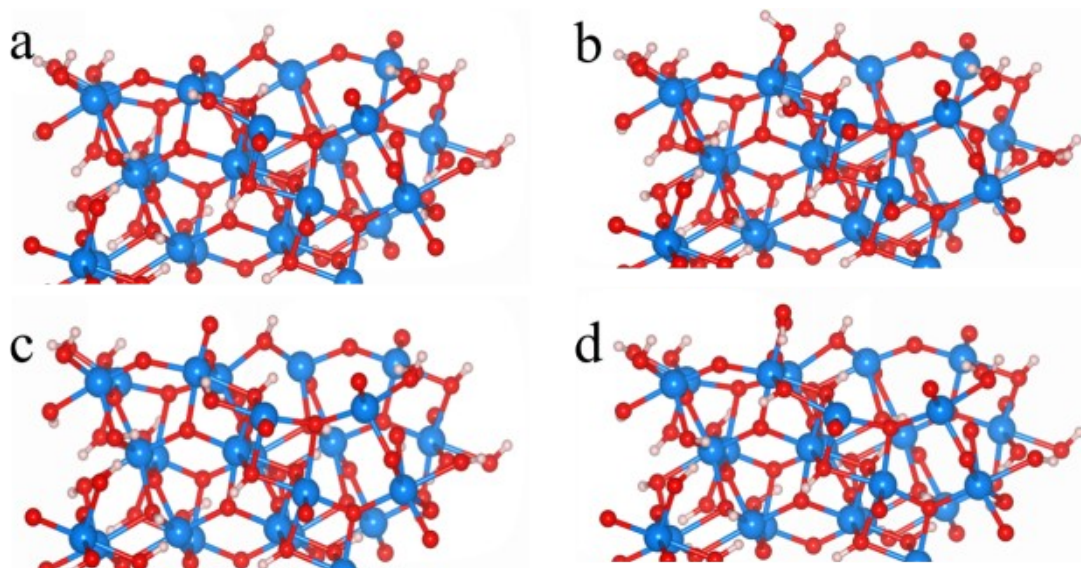

**Fig. S27** Optimized configurations of a) V<sub>O</sub>-FeOOH and b) O\*, c) OH\*, and d) OOH\* species adsorbed on V<sub>O</sub>-FeOOH sample.

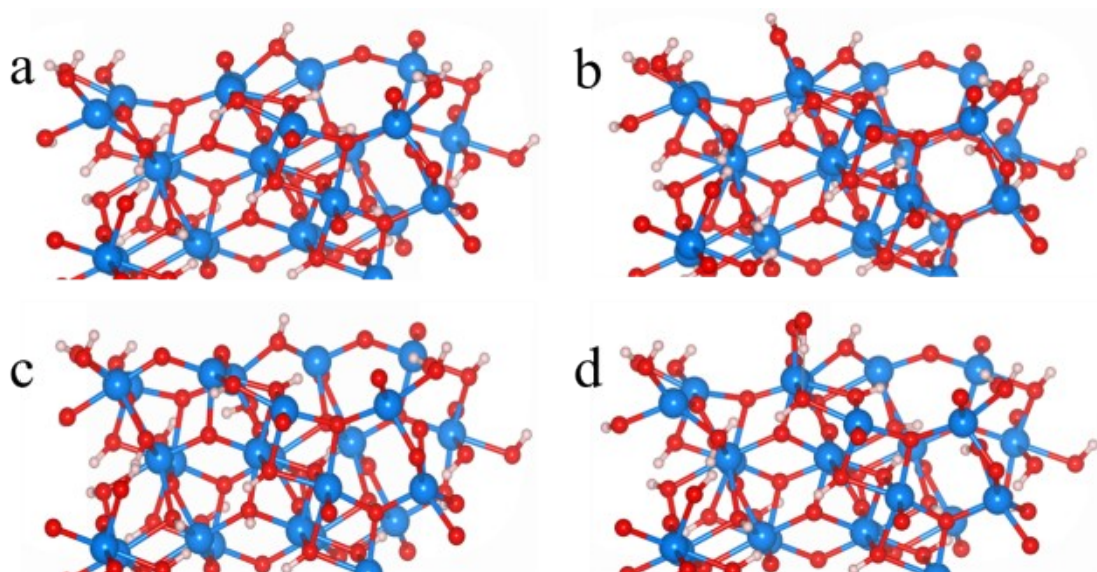

**Fig. S28** Optimized configurations of a) FeOOH and b) O\*, c) OH\*, and d) OOH\* species adsorbed on FeOOH samples.

### 3. Supplementary Tables

**Table S1.** Comparison of the OER performance of V<sub>O</sub>-FeOOH catalyst with other reported OER catalysts

| Catalyst                                | Electrolyte | Current density/mA cm <sup>-2</sup> | Overpotential / mV | catalyst loading/mg cm <sup>-2</sup> | Reference |
|-----------------------------------------|-------------|-------------------------------------|--------------------|--------------------------------------|-----------|
| δ-FeOOH                                 | 1M KOH      | 10                                  | 265                | 2.50                                 | 11        |
| F(V)OOH-1.5                             | 1M KOH      | 10                                  | 232                | 1.92                                 | 12        |
| α-FeOOH nanorod                         | 1M KOH      | 10                                  | 333                | 3.00                                 | 13        |
| FeOOH SHTs                              | 1M KOH      | 10                                  | 245                | 4.00                                 | 14        |
| CoOOH                                   | 1M KOH      | 10                                  | 295                | -----                                | 15        |
| S-FeOOH                                 | 1M KOH      | 10                                  | 244                | 0.29                                 | 16        |
| NiOOH/Fe <sub>2</sub> O <sub>3</sub>    | 1M KOH      | 10                                  | 325                | -----                                | 17        |
| CoCuFe-S                                | 1M KOH      | 10                                  | 300                | 0.23                                 | 18        |
| Co-B film                               | 1M KOH      | 10                                  | 280                | -----                                | 19        |
| ZnCo <sub>2</sub> O <sub>4</sub> /FeOOH | 1M KOH      | 10                                  | 299                | 0.21                                 | 20        |
| FeCo@C                                  | 1M KOH      | 10                                  | 302                | 0.08                                 | 21        |
| Fe-CoOOH/G                              | 1M KOH      | 10                                  | 330                | 0.04                                 | 22        |
| FeCo-LDH/PANI                           | 1M KOH      | 10                                  | 323                | 2.00                                 | 23        |
| NiCoP/C@FeOOH                           | 1M KOH      | 10                                  | 271                | 0.26                                 | 24        |
| FeOOH@Ni(OH) <sub>2</sub>               | 1M KOH      | 10                                  | 310                | 0.25                                 | 25        |
| FeOOH/CoO                               | 1M KOH      | 10                                  | 256                | 4.00                                 | 26        |
| FeOOH-LaNiO <sub>3</sub>                | 1M KOH      | 10                                  | 360                | 0.23                                 | 27        |
| V <sub>O</sub> -FeOOH                   | 1M KOH      | 10                                  | 255                | 0.49                                 | This work |

#### 4. Reference

1. J. Lu, Z. Wang, Y. Guo, Z. Jin, G. Cao, J. Qiu, F. Lian, A. Wang, W. Wang, Ultrathin nanosheets of FeOOH with oxygen vacancies as efficient polysulfide electrocatalyst for advanced lithium–sulfur batteries. *Energy Stor. Mater.* **2022**, *47*, 561-568.
2. J.-J. Zhang, W.-W. Bao, X.-H. Feng, C.-M. Yang, N.-L. Wang, Y.-J. Qiu, J.-T. Li, P.-F. Zhang, Z.-H. Luo, Layered double hydroxides as a robust catalyst for water oxidation through strong substrate-catalytic layer interaction. *Int. J. Hydrogen Energy* **2023**.
3. G. Kresse, J. Furthmüller, Efficient iterative schemes for ab initio total-energy calculations using a plane-wave basis set. *Phys. Rev. B* **1996**, *54*, 11169-11186.
4. J. P. Perdew, K. Burke, M. Ernzerhof, Generalized Gradient Approximation Made Simple. *Phys. Rev. Lett.* **1996**, *77*, 3865-3868.
5. Y. Zhang, W. Yang, Comment on "Generalized Gradient Approximation Made Simple". *Phys. Rev. Lett.* **1998**, *80*, 890-890.
6. B. Hammer, L. B. Hansen, J. K. Nørskov, Improved adsorption energetics within density-functional theory using revised Perdew-Burke-Ernzerhof functionals. *Phys. Rev. B* **1999**, *59*, 7413-7421.
7. H. J. Monkhorst, J. D. Pack, Special points for Brillouin-zone integrations. *Phys. Rev. B* **1976**, *13*, 5188-5192.
8. P. E. Blöchl, Projector augmented-wave method. *Phys. Rev. B* **1994**, *50*, 17953-17979.
9. S. Grimme, J. Antony, S. Ehrlich, H. Krieg, A consistent and accurate ab initio parametrization of density functional dispersion correction (DFT-D) for the 94 elements H-Pu. *J. Chem. Phys.* **2010**, *132*.
10. J. Masa, P. Weide, D. Peeters, I. Sinev, W. Xia, Z. Sun, C. Somsen, M. Muhler, W. Schuhmann, Amorphous Cobalt Boride (Co<sub>2</sub>B) as a Highly Efficient Nonprecious Catalyst for Electrochemical Water Splitting: Oxygen and Hydrogen Evolution. *Adv. Energy Mater.* **2016**, *6*, 1502313.
11. X. Ji, C. Cheng, Z. Zang, L. Li, X. Li, Y. Cheng, X. Yang, X. Yu, Z. Lu, X. Zhang, H. Liu, Ultrathin and porous δ-FeOOH modified Ni<sub>3</sub>S<sub>2</sub> 3D heterostructure nanosheets with excellent alkaline overall water splitting performance. *J. Mater. Chem. A* **2020**, *8*, 21199-21207.
12. F. N. I. Sari, H.-S. Chen, A. k. Anbalagan, Y.-J. Huang, S.-C. Haw, J.-M. Chen, C.-H. Lee, Y.-H. Su, J.-M. Ting, V-doped, divacancy-containing β-FeOOH electrocatalyst for high performance oxygen evolution reaction. *Chem. Eng. J.* **2022**, *438*, 135515.
13. C. Manjunatha, N. Srinivasa, S. Samriddhi, C. Vidya, S. Ashoka, Studies on anion-induced structural transformations of iron(III) (Hydr)oxide micro-nanostructures and their oxygen evolution reaction performance. *Solid State Sciences* **2020**, *106*, 106314.
14. Y. Zhang, X.-A. Teng, Z.-Q. Ma, R.-M. Wang, W.-M. Lau, A.-X. Shan, Synthesis of FeOOH scaly hollow tubes based on Cu<sub>2</sub>O wire templates toward high-efficiency oxygen evolution reaction. *Rare Metals* **2023**, *42*, 1836-1846.
15. S. Ye, J. Wang, J. Hu, Z. Chen, L. Zheng, Y. Fu, Y. Lei, X. Ren, C. He, Q. Zhang, J. Liu, Electrochemical Construction of Low-Crystalline CoOOH Nanosheets with Short-Range Ordered Grains to Improve Oxygen Evolution Activity. *ACS Catal.* **2021**, *11*, 6104-6112.
16. X. Chen, Q. Wang, Y. Cheng, H. Xing, J. Li, X. Zhu, L. Ma, Y. Li, D. Liu, S-Doping Triggers Redox Reactivities of Both Iron and Lattice Oxygen in FeOOH for Low-Cost and High-Performance Water Oxidation. *Adv. Funct. Mater.* **2022**, *32*, 2112674.
17. P. Sagar, K. Yogesh, A. Syed, N. Marraiki, A. M. Elgorban, N. S. S. Zaghloul, S. Ashoka, Studies on the effect of crystalline Fe<sub>2</sub>O<sub>3</sub> on OER performance of amorphous NiOOH electrodeposited on

stainless steel substrate. *Chem.Papers* **2022**, *76*, 7195-7203.

18. S. Zhang, Y. Sun, F. Liao, Y. Shen, H. Shi, M. Shao, Co<sub>9</sub>S<sub>8</sub>-CuS-FeS trimetal sulfides for excellent oxygen evolution reaction electrocatalysis. *Electrochim. Acta* **2018**, *283*, 1695-1701.

19. S. Gupta, H. Jadhav, S. Sinha, A. Miotello, M. K. Patel, A. Sarkar, N. Patel, Cobalt-Boride Nanostructured Thin Films with High Performance and Stability for Alkaline Water Oxidation. *ACS Sustain. Chem. Eng.* **2019**, *7*, 16651-16658.

20. Z. Yu, Y. Bai, N. Zhang, W. Yang, J. Ma, Z. Wang, W. Sun, J. Qiao, K. Sun, Metal-organic framework-derived heterostructured ZnCo<sub>2</sub>O<sub>4</sub>@FeOOH hollow polyhedrons for oxygen evolution reaction. *J. Alloys Compd.* **2020**, *832*, 155067.

21. X.T. Han, C. Yu, S. Zhou, C.T. Zhao, H.W. Huang, J. Yang, Z.B. Liu, J.J. Zhao, J.S. Qiu, Ultrasensitive Iron Triggered Nanosized Fe-CoOOH Integrated with Graphene for Highly Efficient Oxygen Evolution, **2017**, *7*, 1614-6832.

22. Q. Wu, T. L. Li, W. J. Wang, Y. P. Xiao, High-throughput chainmail catalyst FeCo@C nanoparticle for oxygen evolution reaction, *Int J Hydrogen Energy*, 2020, *45*, 26574-26582.

23. X.Q. Han, Z.H. Lin, X.Q. He, L.L. Cui, D.X. Lu, The construction of defective FeCo-LDHs by in-situ polyaniline curved strategy as a desirable bifunctional electrocatalyst for OER and HER, *Int J Hydrogen Energy*, **2020**, *45*, 26989-26999.

24. J.-G. Li, Y. Gu, H. Sun, L. Lv, Z. Li, X. Ao, X. Xue, G. Hong, C. Wang, Engineering the coupling interface of rhombic dodecahedral NiCoP/C@FeOOH nanocages toward enhanced water oxidation. *Nanoscale* **2019**, *11*, 19959-19968.

25. J. Wang, S. Li, R. Lin, G. Tu, J. Wang, Z. Li, MOF-derived hollow β-FeOOH polyhedra anchored with α-Ni(OH)<sub>2</sub> nanosheets as efficient electrocatalysts for oxygen evolution. *Electrochim. Acta* **2019**, *301*, 258-266.

26. C. Qiu, S. He, Y. Wang, Q. Wang, C. Zhao, Interfacial Engineering FeOOH/CoO Nanoneedle Array for Efficient Overall Water Splitting Driven by Solar Energy. *Chem.Eur. J.* **2020**, *26*, 4120-4127.

27. Z. Zhang, B. He, L. Chen, H. Wang, R. Wang, L. Zhao, Y. Gong, Boosting Overall Water Splitting via FeOOH Nanoflake-Decorated PrBa<sub>0.5</sub>Sr<sub>0.5</sub>Co<sub>2</sub>O<sub>5+δ</sub> Nanorods. *ACS Appl. Mater. Interfaces* **2018**, *10*, 38032-38041.
